# Supplementary material for: Casein Kinase 1D Encodes a Novel Drug Target in Hedgehog—GLI-Driven Cancers and Tumor-Initiating Cells Resistant to SMO Inhibition
Source: MDPI journal article supplement (doi:10.3390/cancers13164227), 2021-08-23
Supplement: s1 [file s1]

# Supplementary Material: Casein Kinase 1D Encodes a Novel Drug Target in Hedgehog–GLI-Driven Cancers and Tumor-Initiating Cells Resistant to SMO Inhibition

Elisabeth Peer, Sophie Karoline Aichberger, Filip Vilotic, Wolfgang Gruber, Thomas Parigger, Sandra Grund-Gröschke, Dominik Patrick Elmer, Florian Rathje, Andrea Ramsbacher, Mirko Zaja, Susanne Michel, Svetlana Hamm and Fritz Aberger

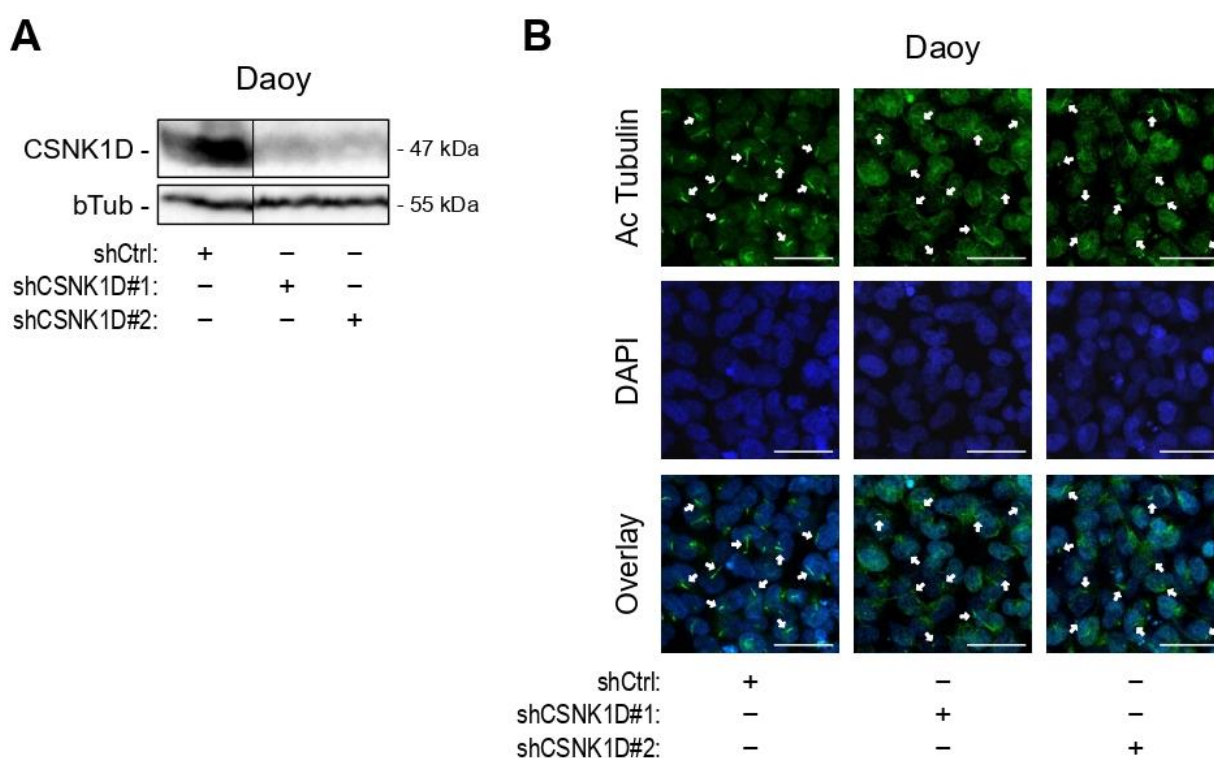

**Figure S1.** Targeting CSNK1D does not interfere with ciliogenesis in Daoy cells. **(A)** Representative. Western blot analysis of CSNK1D in Daoy cells lentivirally transduced with shCSNK1D (#1, #2) or control shRNA (shCtrl). **(B)** Confocal imaging of primary cilia in Daoy cells lentivirally transduced with shCSNK1D (#1, #2) or control shRNA (shCtrl). For visualization of primary cilia (indicated by white arrows) Daoy cells were stained with antibodies against acetylated tubulin as described previously [1]. Scale bars: 50  $\mu$ m.

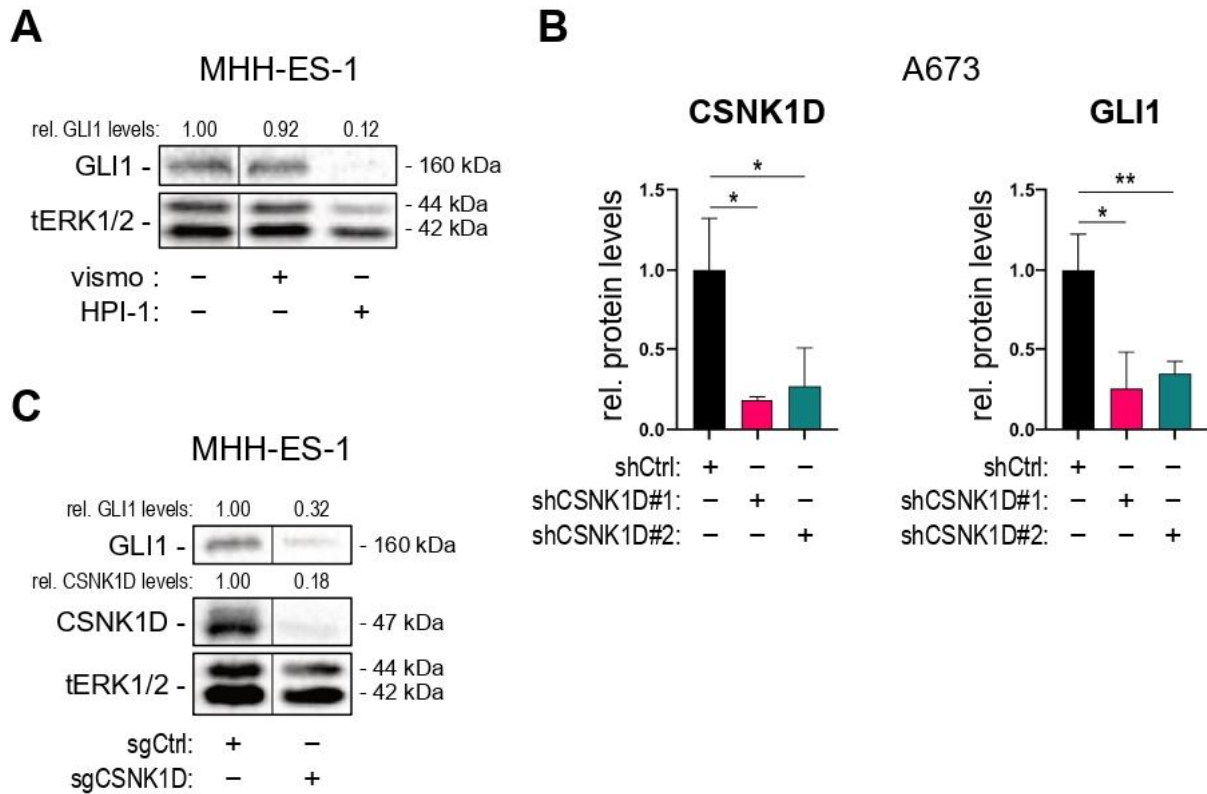

**Figure S2.** Targeting CSNK1D interferes with oncogenic HH/GLI signaling in SMOi resistant Ewing Sarcoma cells. **(A)** Representative Western blot analysis of GLI1 in MHH-ES-1 cells treated with vismodegib [1  $\mu$ M] or HPI-1 [20  $\mu$ M]. **(B)** Quantification of relative GLI1 protein levels in A673 cells lentivirally transduced with shCSNK1D (#1, #2) or control shRNA (shCtrl) (n = 3). **(C)** Representative Western blot analysis of GLI1 in MHH-ES-1 cells lentivirally transduced with sgCSNK1D or sgCtrl. Quantification of Western blot bands was conducted via densitometric image analysis using Image Lab 5.0 software (Bio-Rad). Relative protein levels normalized to the loading control total ERK (tERK) and to the Ctrl condition are indicated above each protein band. Student's t test was used for statistical analysis (\* $P$  < 0.05; \*\* $P$  < 0.01).

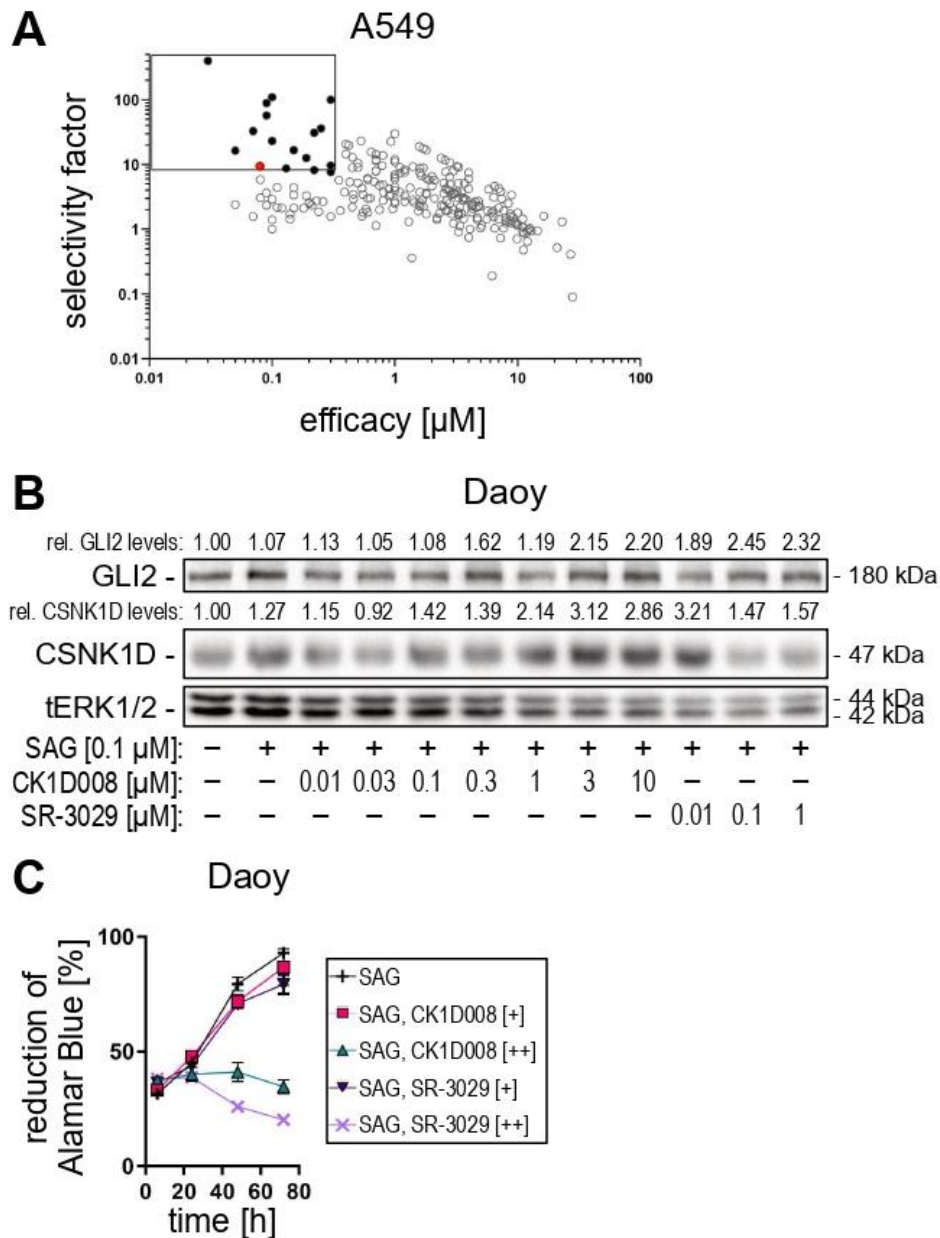

**Figure S3.** Effects of pharmacological targeting of CSNK1D on the proliferation of A549 and Daoy cells. **(A)** Cellular compound screening cascade in A549 cells. Compounds (black dots) with an  $\text{IC}_{50}$  below  $0.3 \mu\text{M}$  under non-proliferating conditions (= efficacy) and a selectivity factor of at least 10 were selected for further evaluation. CK1D008 is highlighted by a red dot. **(B)** Representative Western blot analysis of GLI2 and CSNK1D protein levels in Daoy cells treated with SAG [100 nM] and increasing concentrations of CK1D008 [0.01 – 10  $\mu\text{M}$ ] or SR-3029 [0.01 – 1  $\mu\text{M}$ ]. **(C)** Daoy cells were treated with SAG [100 nM] and increasing concentrations of CK1D008 ([0.3  $\mu\text{M}$ ] (+), [3  $\mu\text{M}$ ] (++)) or SR-3029 ([0.1  $\mu\text{M}$ ] (+), [1  $\mu\text{M}$ ] (++)) and proliferation was assessed in AlamarBlue assays.

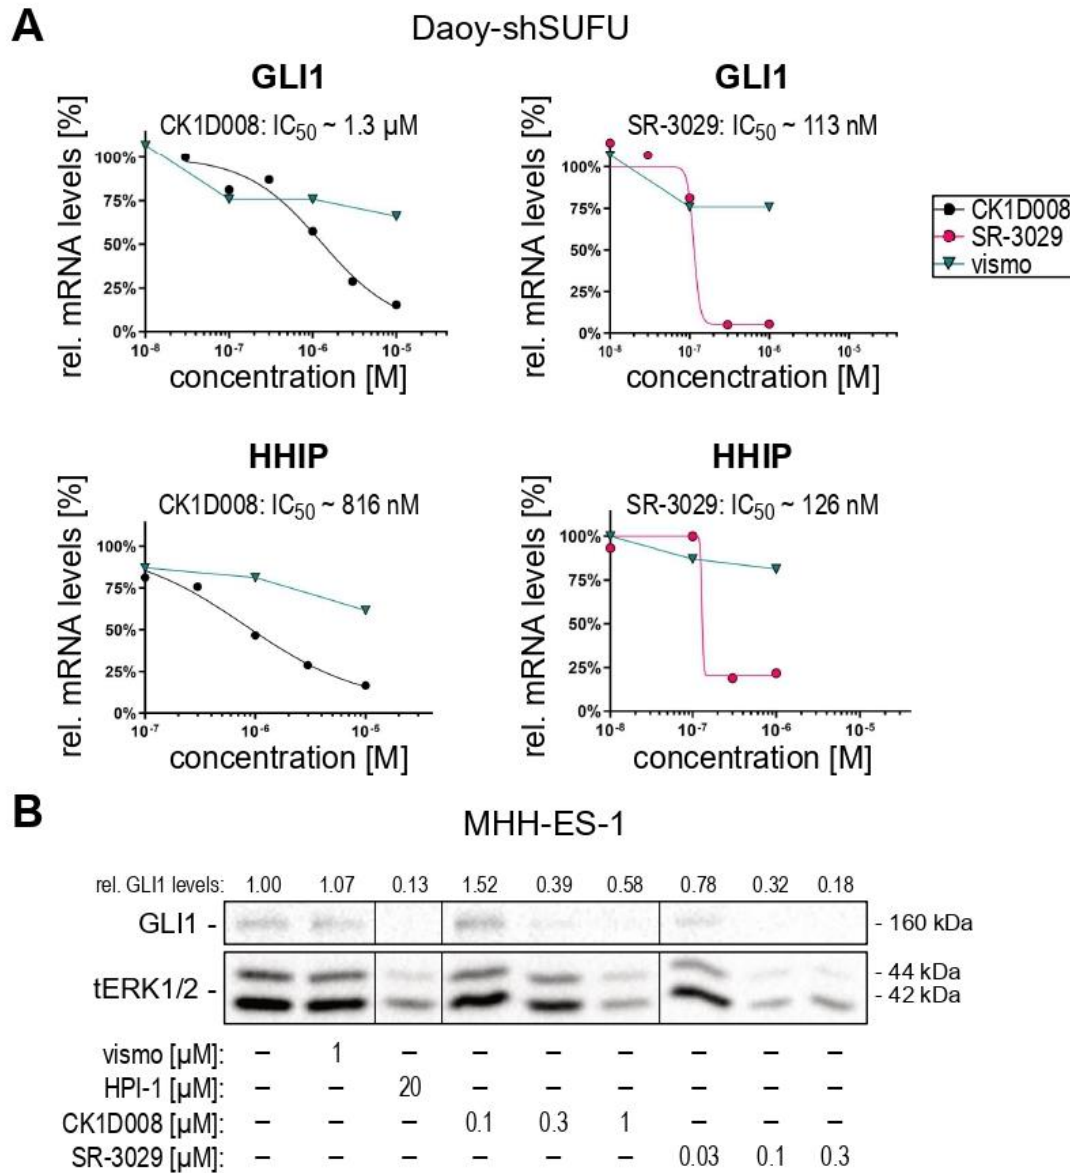

**Figure S4.** Targeting of CSNK1D reduces HH target gene expression in SMOi resistant cell lines. **(A)** CK1D008 and SR-3029 reduce HH/GLI target gene expression in Daoy-shSUFU medulloblastoma cells with IC<sub>50</sub> values in the low micromolar or nanomolar range, respectively. mRNA expression levels of GLI1 and HHIP were analyzed by qPCR and expressed as percentage relative to the control condition. **(B)** Representative Western blot analysis of GLI1 in MHH-ES-1 cells treated with vismo [1  $\mu$ M], HPI-1 [20  $\mu$ M], CK1D008 [0.1 – 1  $\mu$ M] or SR-3029 [0.03 – 0.3  $\mu$ M]. Relative quantification of Western blot bands was conducted via densitometric image analysis using Image Lab 5.0 software (Bio-Rad). Relative protein levels normalized to the loading control total. ERK (tERK) and to the Ctrl condition are indicated above each protein band.

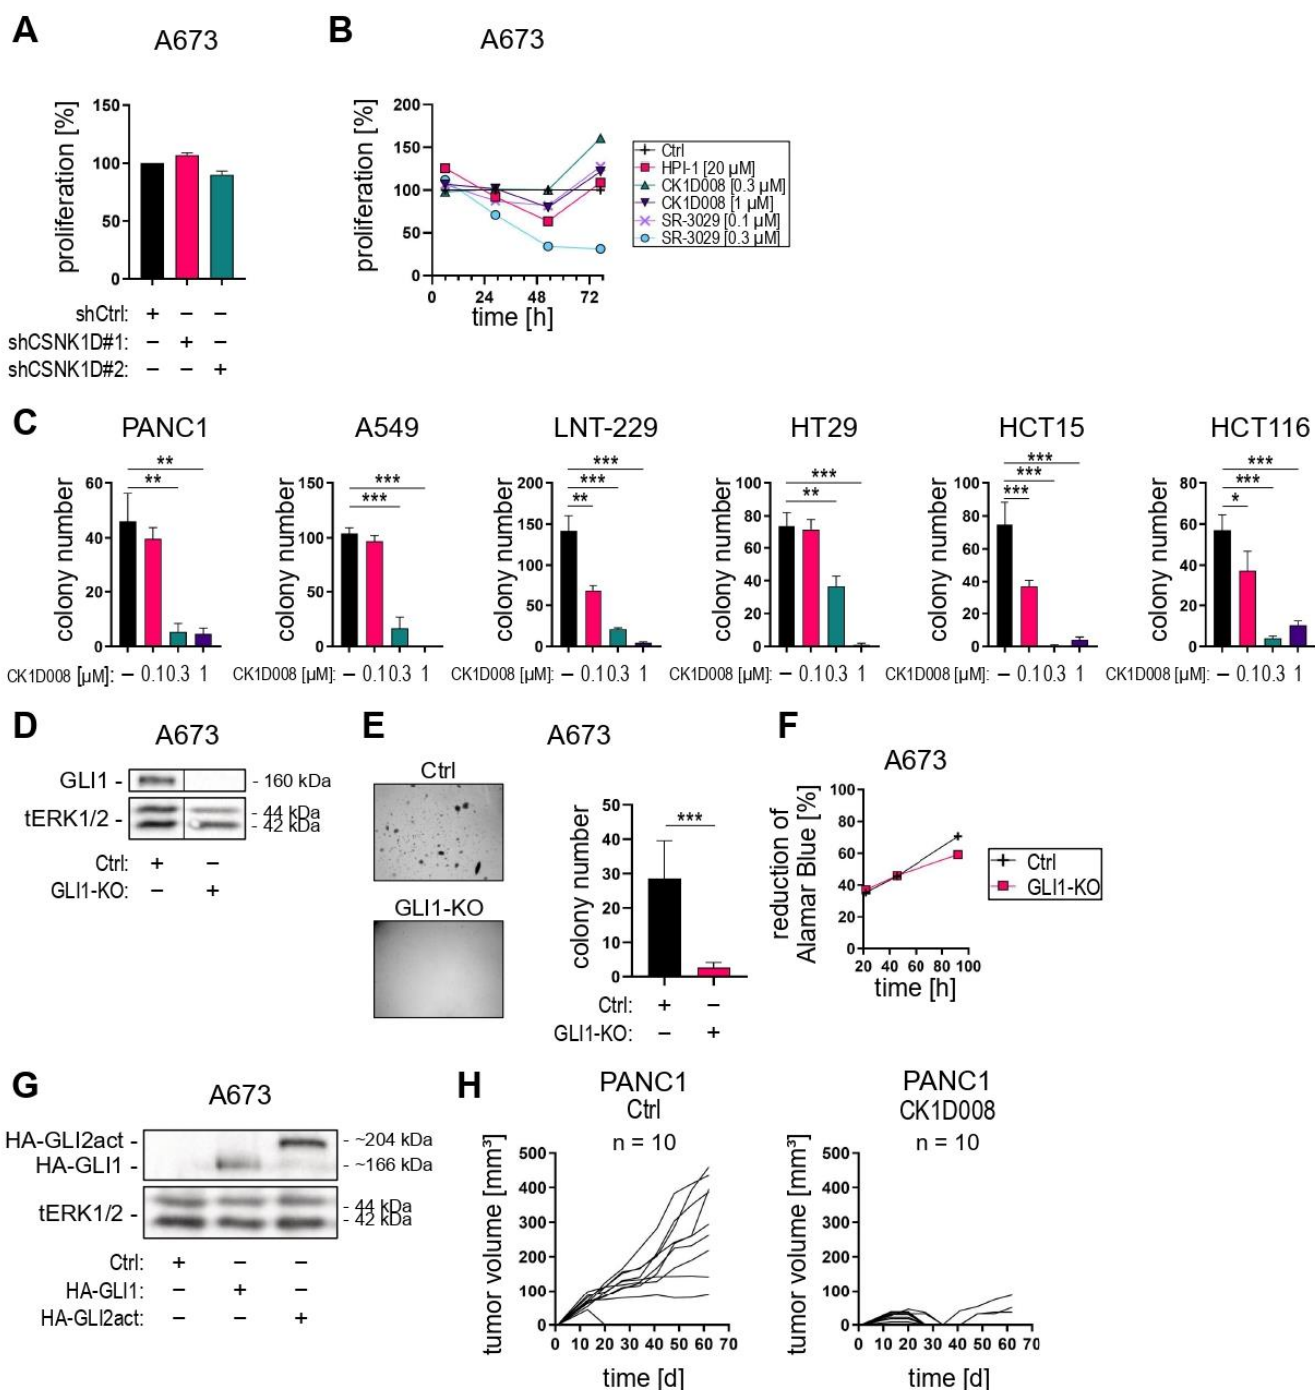

**Figure S5.** Pharmacologic and genetic inhibition of CSNK1D selectively abrogates clonal growth and impairs *in vivo* engraftment of GLI-dependent PANC-1 cancer cells. **(A)** A673 cells were lentivirally transduced with shCSNK1D (#1, #2) or control shRNA (shCtrl) and proliferation was assessed in an AlamarBlue assay (n = 3). **(B)** A673 cells were treated with HPI-1 [20  $\mu$ M], CK1D008 [0.3  $\mu$ M, 1  $\mu$ M] or SR-3029 [0.1  $\mu$ M, 0.3  $\mu$ M] and proliferation was assessed in an AlamarBlue assay. **(C)** PANC1, A549, LNT-229, HT29, HCT15 and HCT116 cells were pre-treated with CK1D008 [0.1  $\mu$ M, 0.3  $\mu$ M, 1  $\mu$ M] for 48h, seeded in limited dilutions and cultured under anchorage-dependent non-proliferating conditions. Colony number was assessed after 9-11 days (n = 3). **(D)** Representative Western blot analysis of GLI1 protein levels in A673 cells lentivirally transduced with sgGLI1 or sgCtrl. **(E)** Knockout of GLI1 reduces anchorage-independent growth of A673 cells in soft agar. Representative images of formed anchorage-independent 3D tumorspheres (left panel), number of colonies (right panel) (n = 5). **(F)** A673 cells were lentivirally transduced with sgGLI1 or sgCtrl and proliferation was assessed in an AlamarBlue assay. **(G)** Representative Western blot analysis of overexpressed HA-tagged GLI1 and HA-tagged GLI2act protein levels in A673 cells. **(H)** PANC1 cells were pre-treated with CK1D008 [0.3  $\mu$ M] for 48h. 1x10<sup>6</sup> viable Ctrl or CK1D008 pre-treated PANC1 cells were engrafted in nude mice and tumor volume was monitored (n = 10). Student's t test was used for statistical analysis (\*P < 0.05; \*\*P < 0.01; \*\*\*P < 0.001).

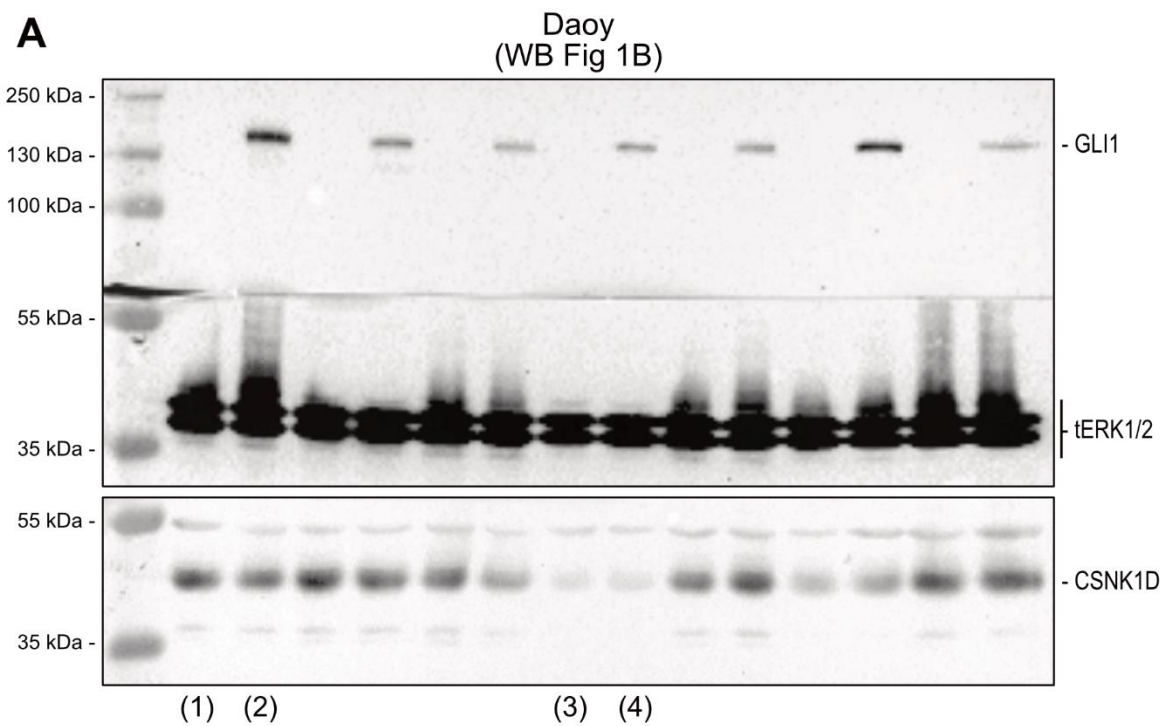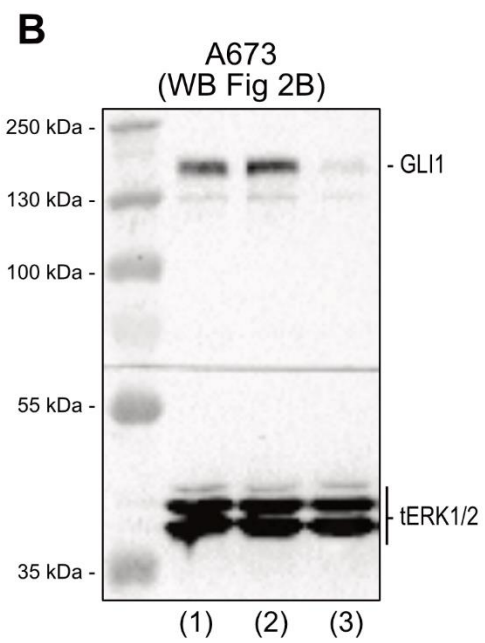

**C**

A673  
(WB Fig 2C left)

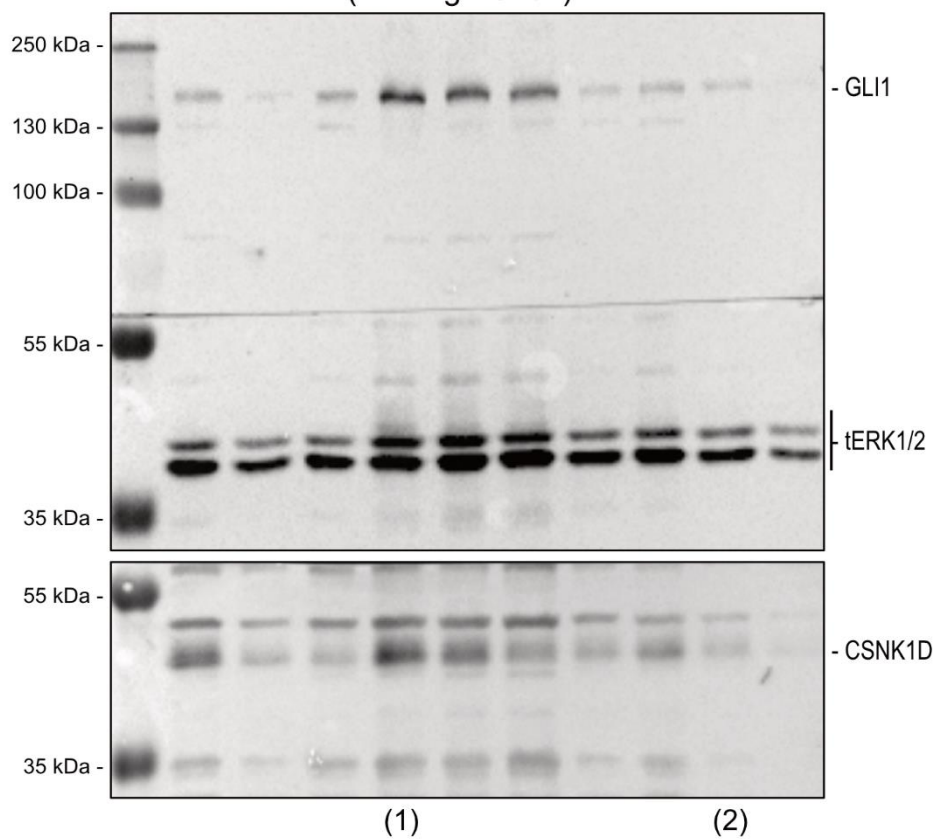

A673  
(WB Fig 2C right)

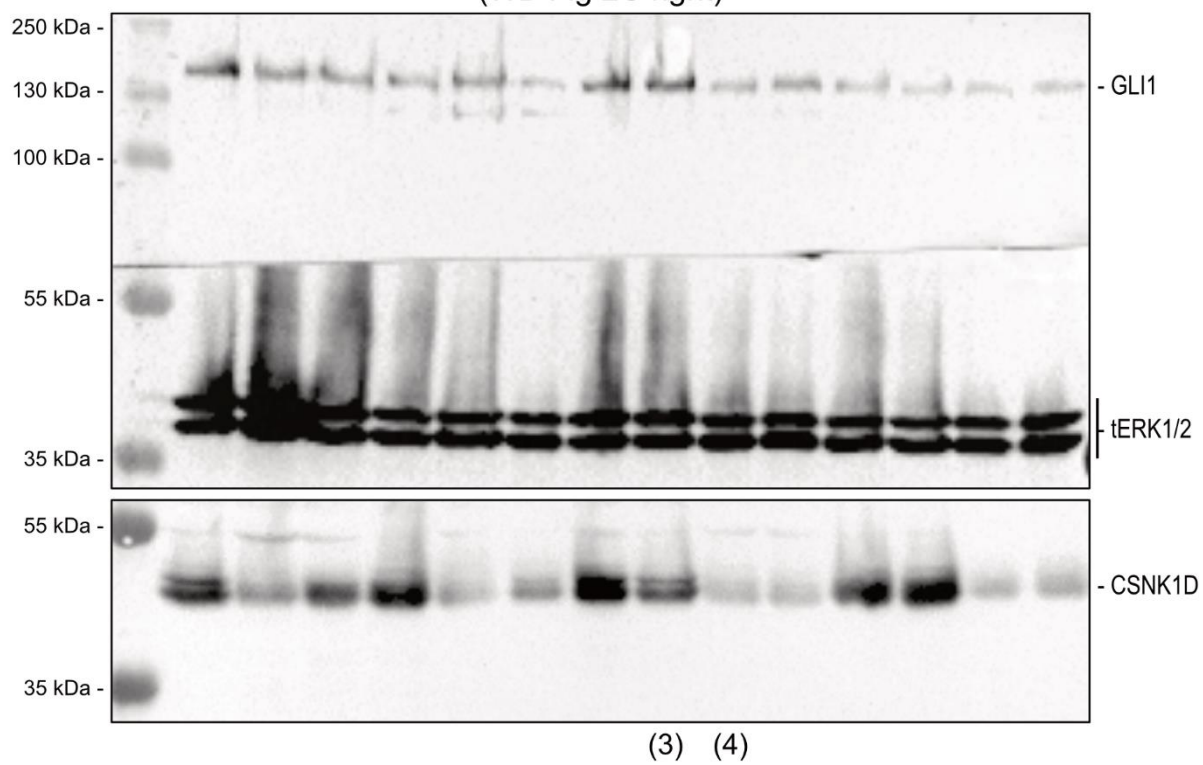

**D**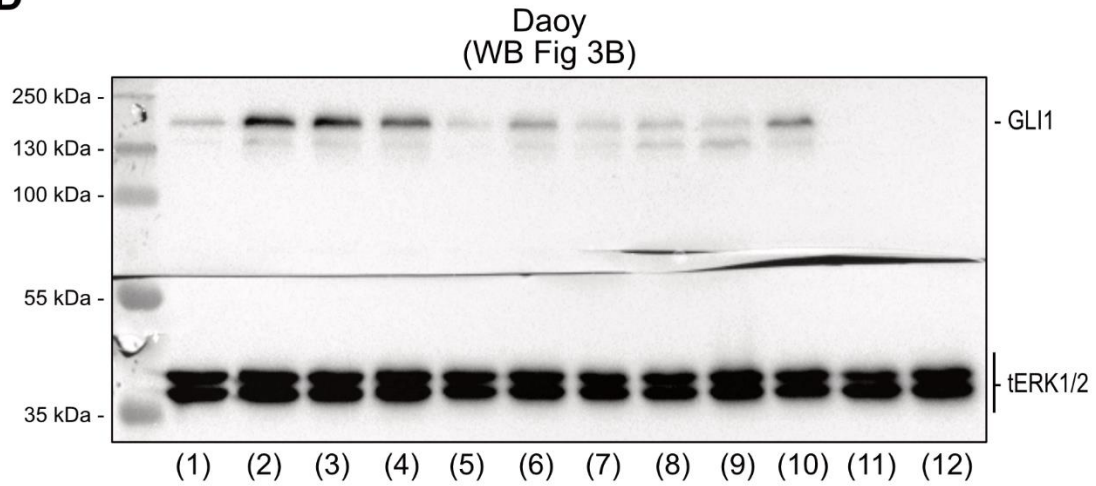**E**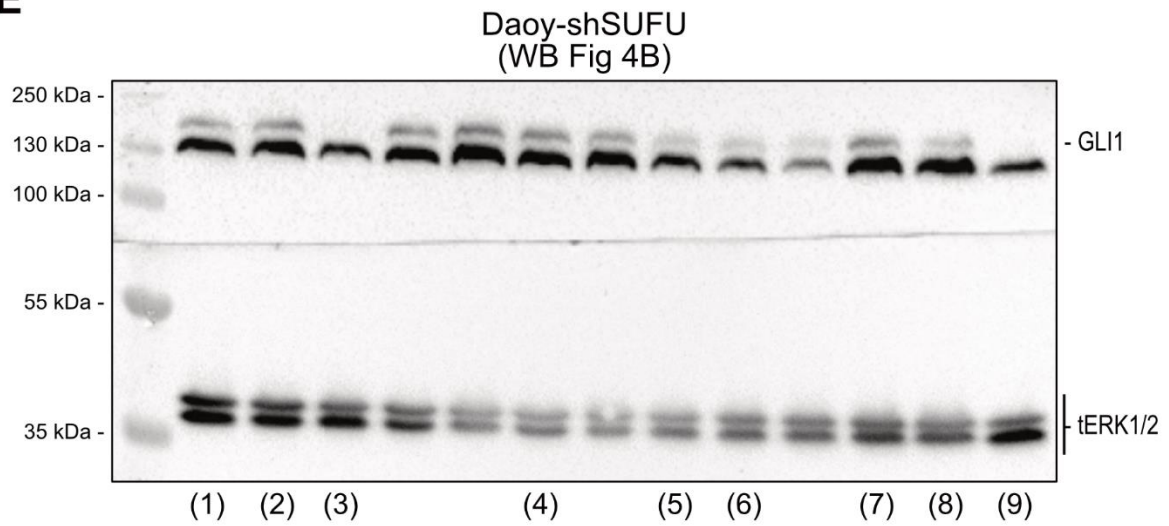**F**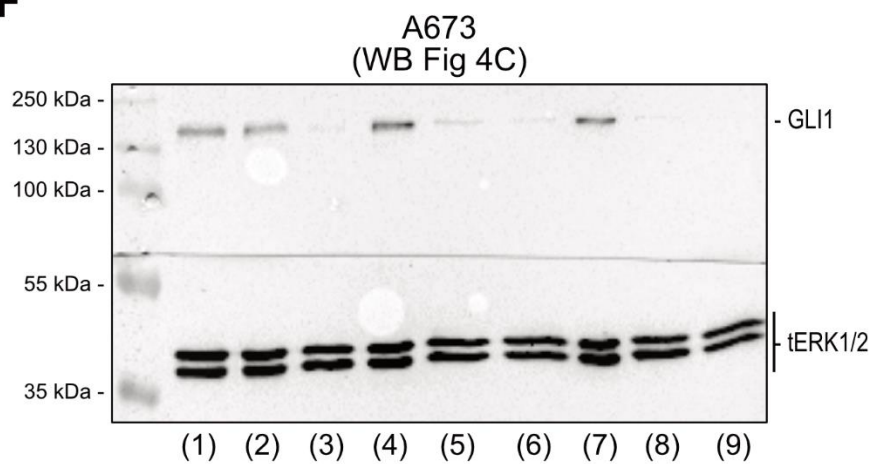

**Figure S6.** Original Western Blot.

**Table S1.** qPCR cycling program.

| Temperature                                            | Duration                                                                  | Type                      |
|--------------------------------------------------------|---------------------------------------------------------------------------|---------------------------|
| 95 °C                                                  | 3 min                                                                     | Hold                      |
| 95 °C                                                  | 10 sec                                                                    | Cycling 40x               |
| 65 °C                                                  | 15 sec                                                                    |                           |
| 72 °C                                                  | 30 sec                                                                    |                           |
| Melting Curve                                          |                                                                           |                           |
| Ramp from 70 °C to 95 °C<br>rising by 0.5 °C each step | Wait for 45 sec on first step,<br>Wait for 5 sec for each step afterwards | Melting curve<br>analysis |

**Table S2.** Western blot antibodies.

| Target (clone)                  | Supplier                                   | Dilution |
|---------------------------------|--------------------------------------------|----------|
| anti-GLI1 (V812)                | Cell Signaling, Danvers, MA, United States | 1:1000   |
| anti-p44/42 MAPK (Erk1/2; tERK) | Cell Signaling, Danvers, MA, United States | 1:1000   |
| anti-HA-Tag (C29F4)             | Cell Signaling, Danvers, MA, United States | 1:1000   |
| anti- $\beta$ -Tubulin (9F3)    | Cell Signaling, Danvers, MA, United States | 1:1000   |
| anti-CSNK1D (AF12G4)            | abcam, Cambridge, United Kingdom           | 1:5000   |
| anti-GLI2 (H-300)               | Santa Cruz, Dallas, TX, United States      | 1:1000   |
| anti-rabbit IgG, HRP-linked     | Cell Signaling, Danvers, MA, United States | 1:3000   |
| anti-mouse IgG, HRP-linked      | Cell Signaling, Danvers, MA, United States | 1:3000   |

**References:**

1. Gruber, W.; Hutzinger, M.; Elmer, D.P.; Parigger, T.; Sternberg, C.; Cegielski, L.; Zaja, M.; Leban, J.; Michel, S.; Hamm, S.; et al. DYRK1B as therapeutic target in Hedgehog/GLI-dependent cancer cells with Smoothed inhibitor resistance. *Oncotarget* **2016**, *7*, 7134-7148, doi:10.18632/oncotarget.6910
